# Supplementary material for: Overexpression of Mucin 1 Suppresses the Therapeutical Efficacy of Disulfiram against Canine Mammary Tumor
Source: PubMed Central journal article supplement (PMC7823863; doi:10.3390/ani11010037), 2020-12-27

# Overexpression of Mucin 1 suppresses the therapeutical efficacy of disulfiram against canine mammary tumor

Ying Zhao, Zixiang Lin, Zhaoyan Lin, Chaoyu Zhou, Gang Liu, Jiahao Lin, Di Zhang\* and Degui Lin\*

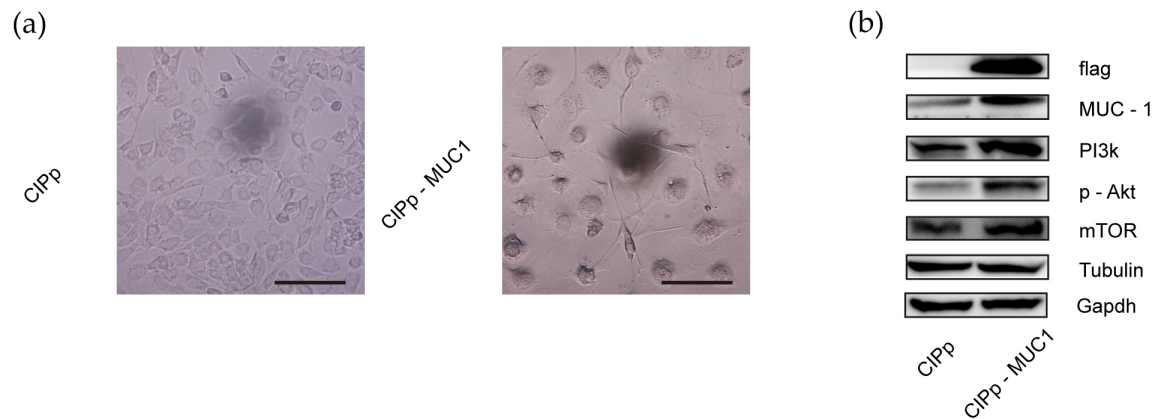

**Figure S1.** Validation of CIPp-MUC1 cell line. (a) Morphology of CIPp and CIPp-MUC1 cells under bright field microscope (bar= 50  $\mu$ m). (b) Western blot analysis of MUC1, flag, PI3K, p-Akt, mTOR in CIPp or CIPp-MUC1 cells. Tubulin and Gapdh were set as internal control.

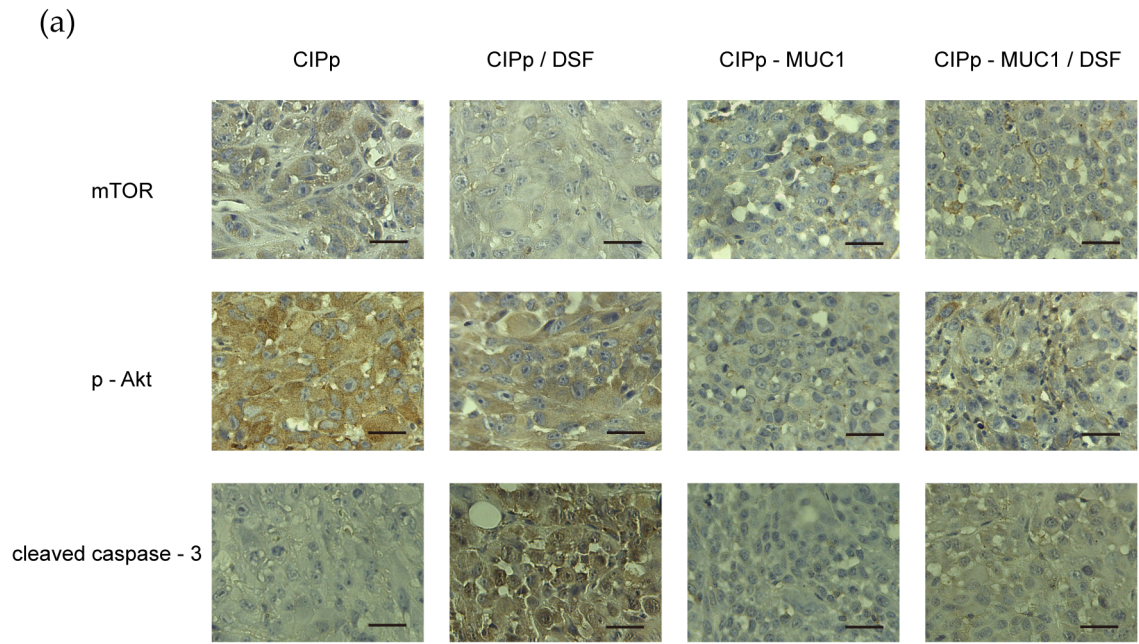

**Figure S2.** Immunohistochemical analysis of the effect of disulfiram on PIK3/Akt signal in xenograft tumors. (a) Immunohistochemical analysis of the level of mTOR, p-AKT and cleaved caspase-3. CIPp and CIPp-MUC1 xenograft tumors with or without 100 nM of disulfiram were compared. Brown color indicated positive signal. Bar=30  $\mu$ m

(a)

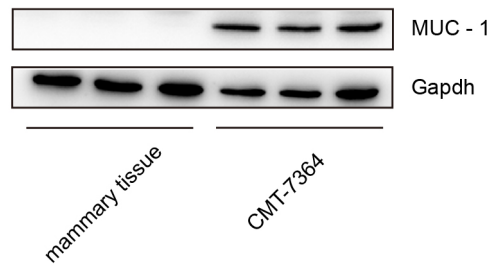

**Figure S3.** Western blot analysis of MUC1 in tumor formed by CMT-7364 or non-lactating mammary tissue. Gapdh was set as internal control.

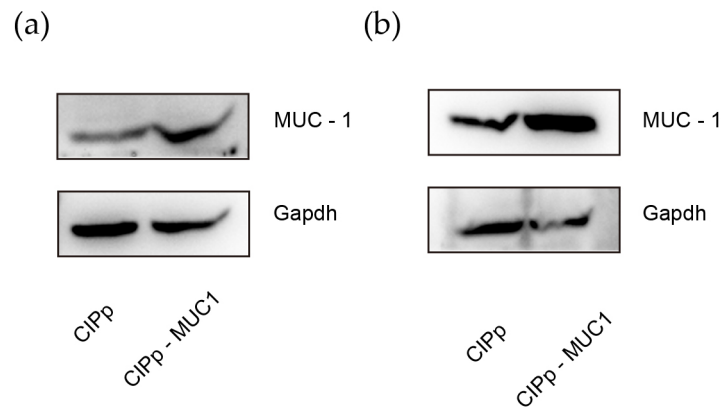

**Figure S4.** MUC-1 expression in different passages of CIPp-MUC1 cell line. (a) Western blot analysis of MUC1 in 10<sup>th</sup> generation of CIPp-MUC1 cells (right) and non-transfected CIPp cells (left). (b) Western blot analysis of MUC1 in 30<sup>th</sup> generation of CIPp-MUC1 cells (right) and non-transfected CIPp cells (left). Gapdh were set as internal control.

# Original images of all Western blot figures

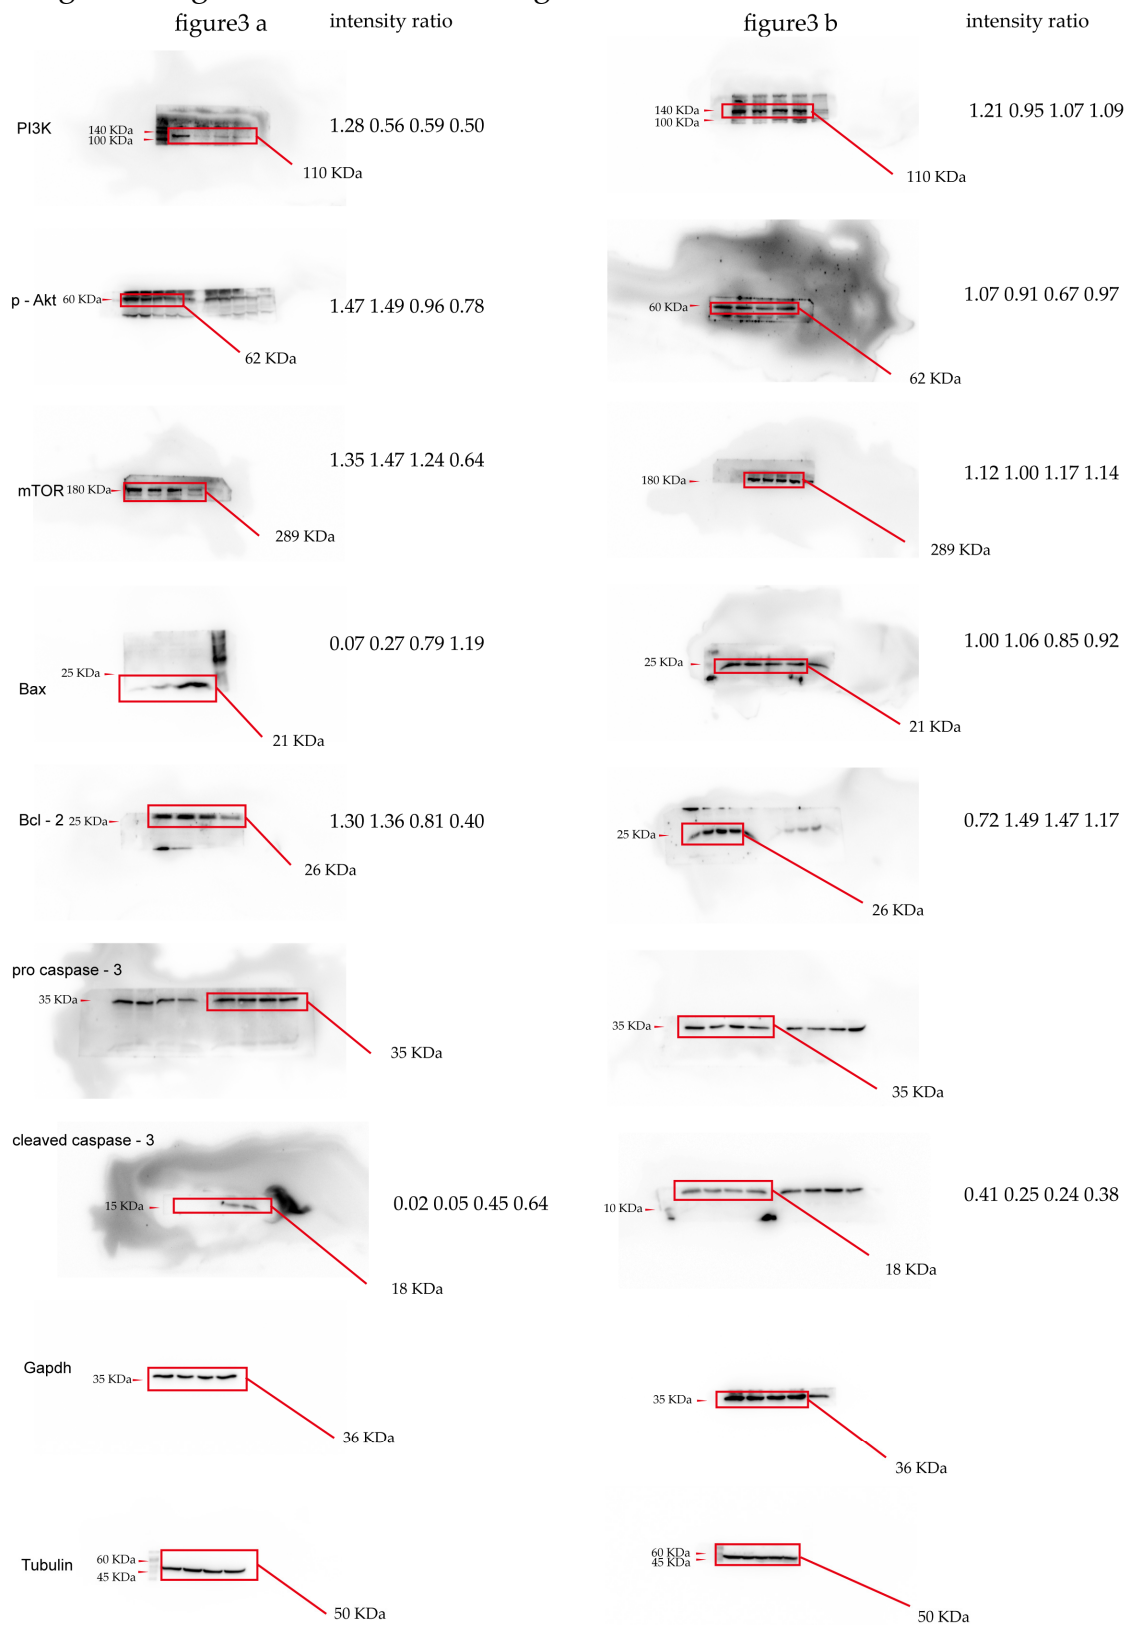

figure4 d

intensity ratio

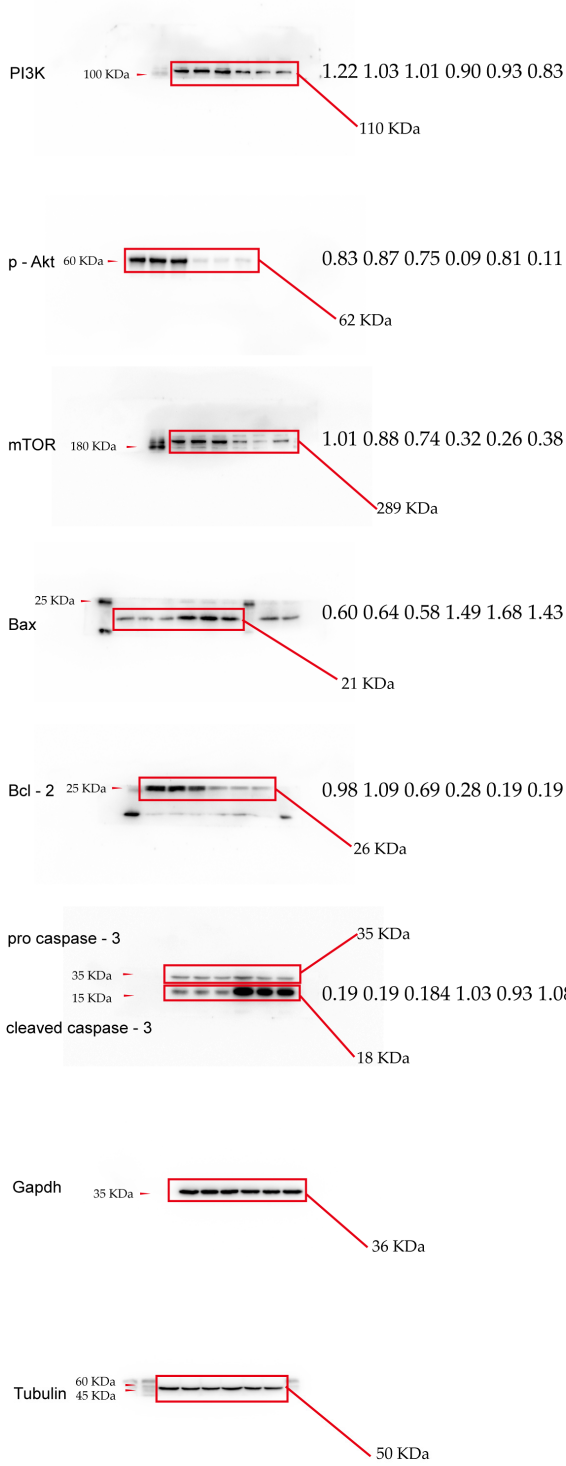

figure4 e

intensity ratio

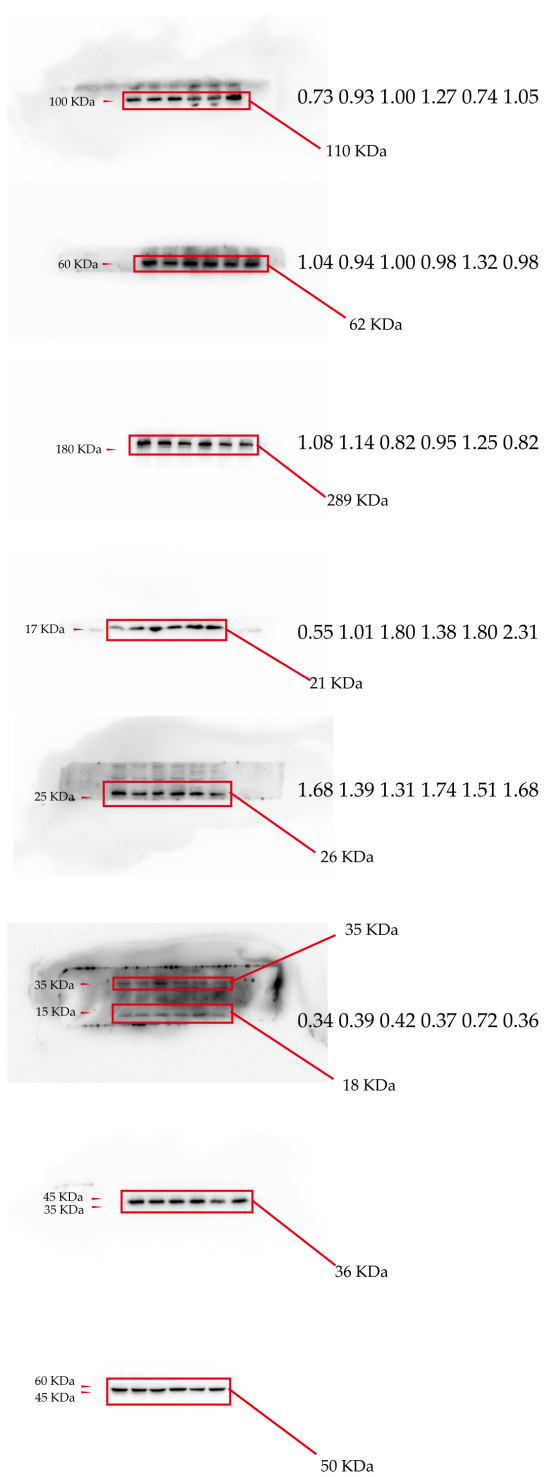

figureS 1

intensity ratio

flag

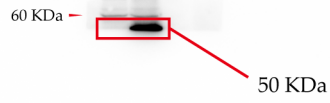

0.068 1.06

MUC - 1

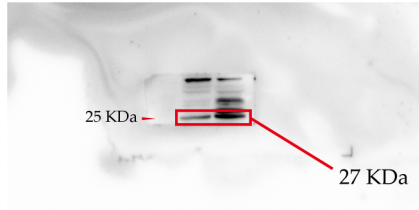

0.41 1.02

PI3k

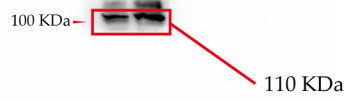

1.08 1.10

p - Akt

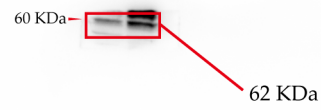

0.40 0.87

mTOR

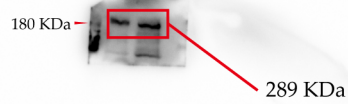

0.84 1.05

Tubulin

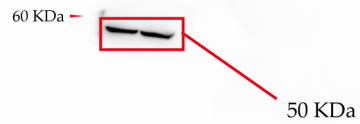

Gapdh

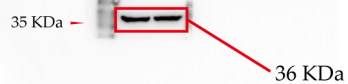

figureS 3

intensity ratio

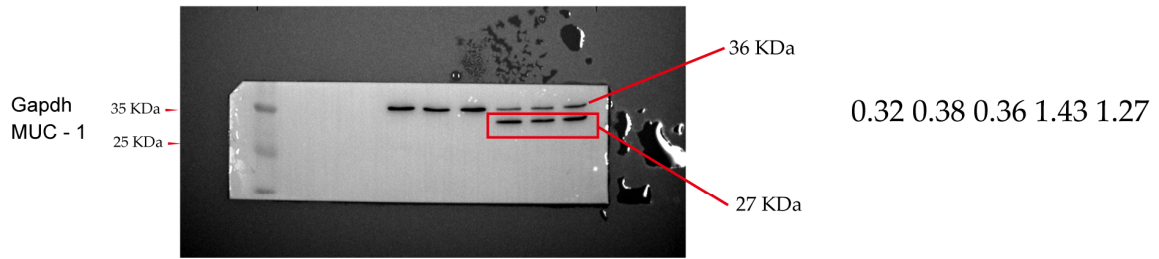

figureS 4

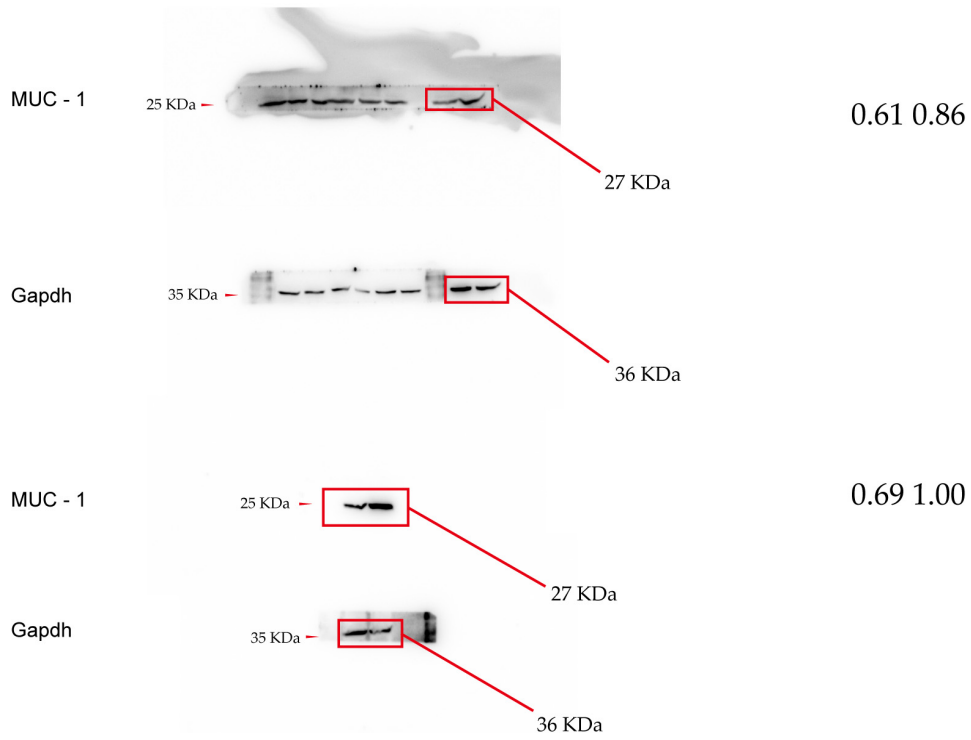

Supplement: animals-11-00037-s001.pdf [file animals-11-00037-s001.pdf]
